# Supplementary material for: AtChem, an open source box-model for the Master Chemical Mechanism
Source: Copernicus journal article supplement (doi:10.5194/gmd-2019-192), 2019-08-02
Supplement: Supplementary file [file gmd-2019-192-AC1-supplement.pdf]

Dear authors, in my role as Executive editor of GMD, I would like to bring to your attention our Editorial version 1.2: <https://www.geosci-model-dev.net/12/2215/2019/>.

This highlights some requirements of papers published in GMD, which is also available on the GMD website in the 'Manuscript Types' section: [http://www.geoscientific-model-development.net/submission/manuscript\\_types.html](http://www.geoscientific-model-development.net/submission/manuscript_types.html). In particular, please note that for your paper, the following requirement has not been met in the Discussions paper: "The main paper must give the model name and version number (or other unique identifier) in the title." Please add the AtChem version number to the title of your revised manuscript

We thank the editor for bringing this point to our attention. The title of the manuscript has been changed to: "AtChem (version 1), an open source box-model for the Master Chemical Mechanism".

Please also note that Beth S. Nelson has been added as co-author and more information on the version of AtChem presented in the manuscript has been added to the text, following comments by both referees.

Additionally, please note, that GMD is encouraging authors to provide a persistent access to the exact version of the source code used for the model version presented in the paper. As explained in [https://www.geoscientific-model-development.net/about/manuscript\\_types.html](https://www.geoscientific-model-development.net/about/manuscript_types.html) the preferred reference to this release is through the use of a DOI which then can be cited in the paper. For projects in GitHub a DOI for a released code version can easily be created using Zenodo, see <https://guides.github.com/activities/citable-code/> for details.

A DOI (10.5281/zenodo.3404021) has been created on Zenodo and added to the GitHub release page and to Section 2 of the manuscript.

Finally note, that according to our new Editorial (v1.2) all data and analysis / plotting scripts should be made available.

All data used in the manuscript are available at the repositories indicated in the "Code and data availability." section. Plotting scripts are not relevant in this case.
